# Supplementary material
Source: PubMed Central journal article supplement (PMC4279728)
Supplement: ASN.2013070764_ASN2013070764SupplementaryData.pdf [file ASN.2013070764_ASN2013070764SupplementaryData.pdf]

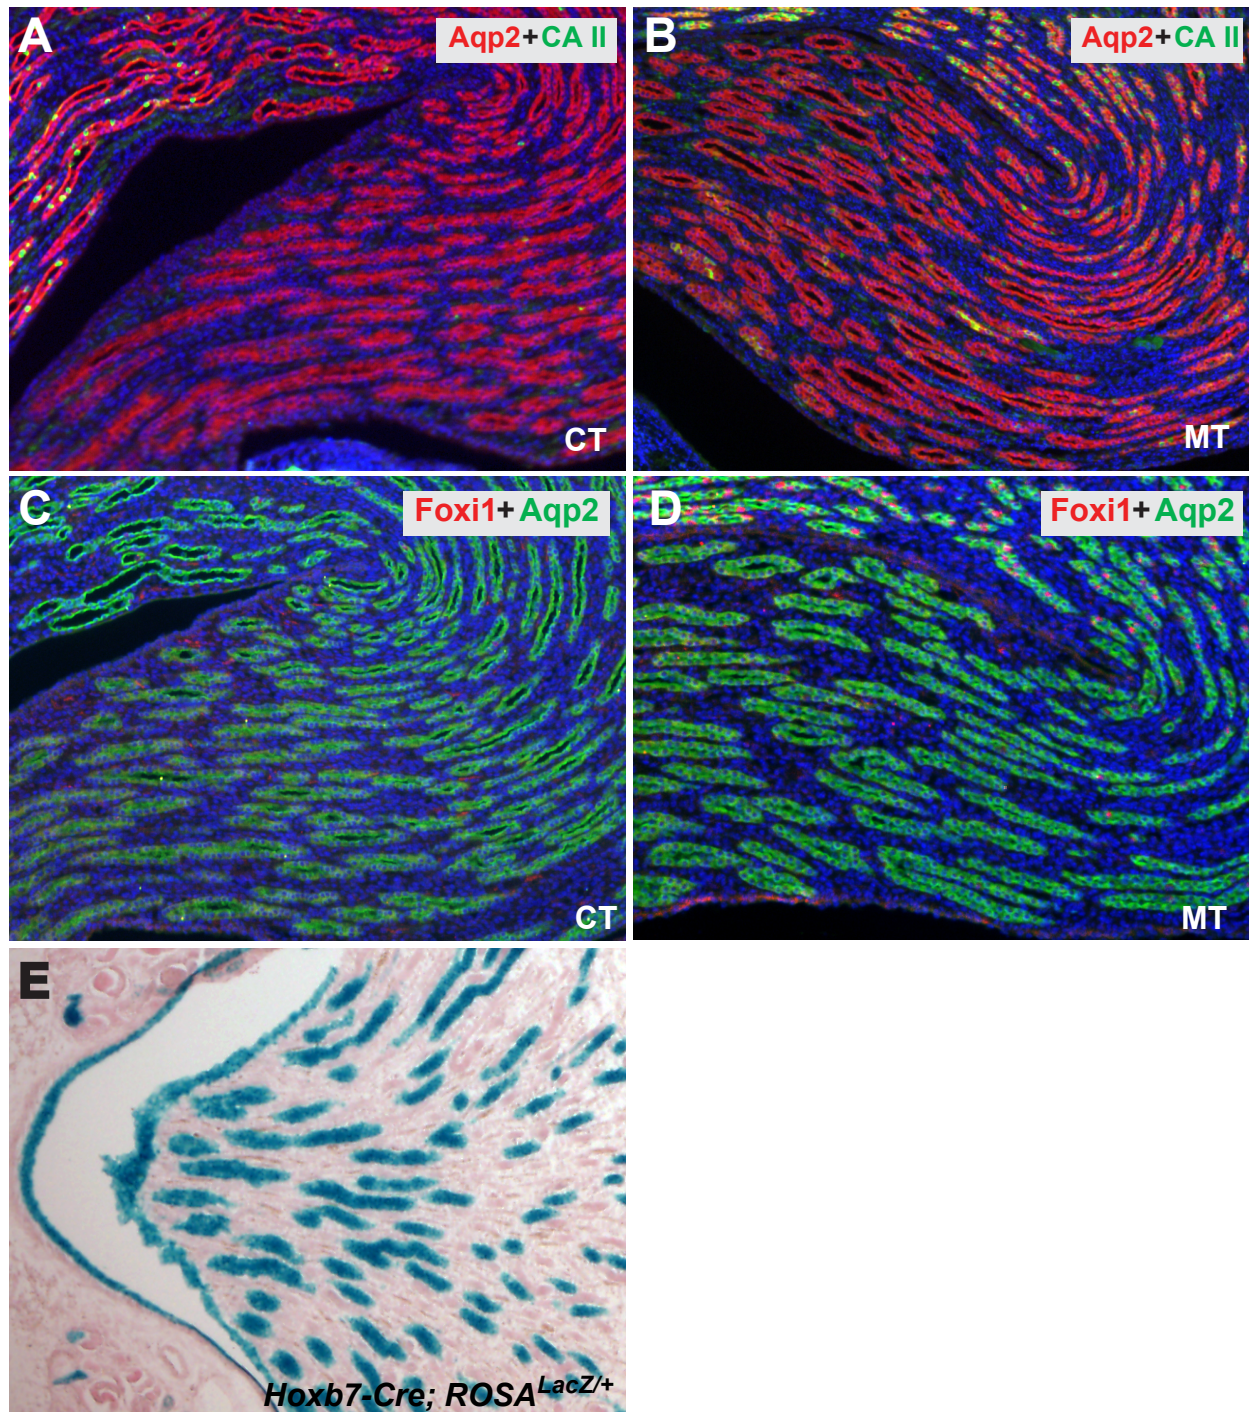

**Supplementary Figure 1: *Adam10* deletion failed to convert cells destined to be PCs in the papilla into IC cells.**

The papillary region in controls (**A**) lacks CAII<sup>+</sup> ICs. Although *Adam10* deletion results in significantly more CAII<sup>+</sup> cells in the medulla (**B**), a similar increase in the papillary region is absent in the mutants. Foxi1 expression is absent in the papilla but presence in the medulla in the controls (**C**). *Adam10* deletion results in an increase of Foxi1 expression in the medulla, but such an increase is essentially absent in the papilla (**D**). *Hoxb7-Cre* expression can be detected in the papilla.
